# Supplementary material for: Urinary Biomarkers as a Proxy for Congenital Central Hypoventilation Syndrome Patient Follow-Up
Source: MDPI journal article supplement (doi:10.3390/antiox11050929), 2022-05-09
Supplement: s1 [file s1]

Supplementary Materials

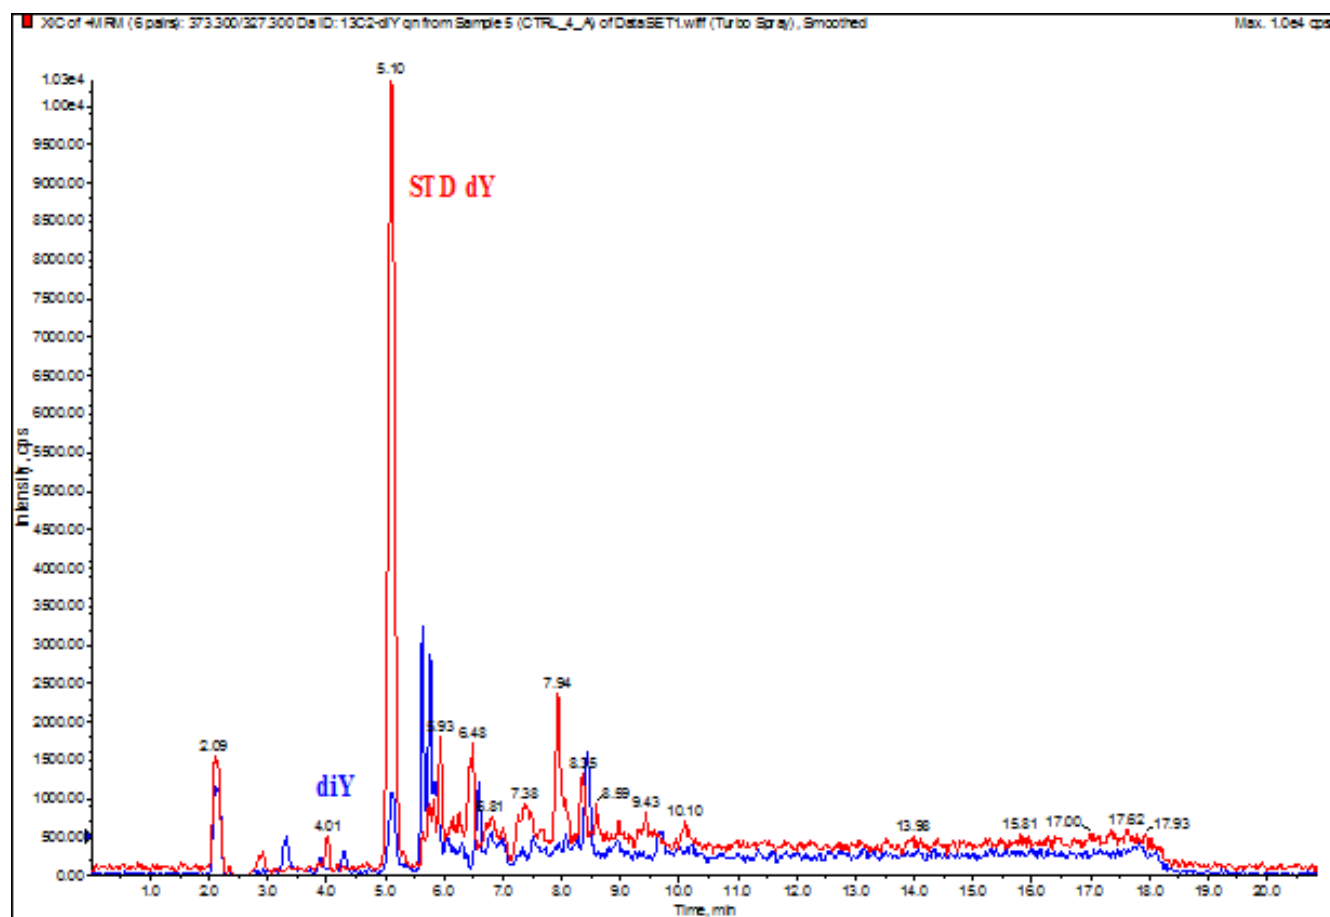

**Figure S1.** Chromatographic separation of diY,  $t_R = 5.1$  min.

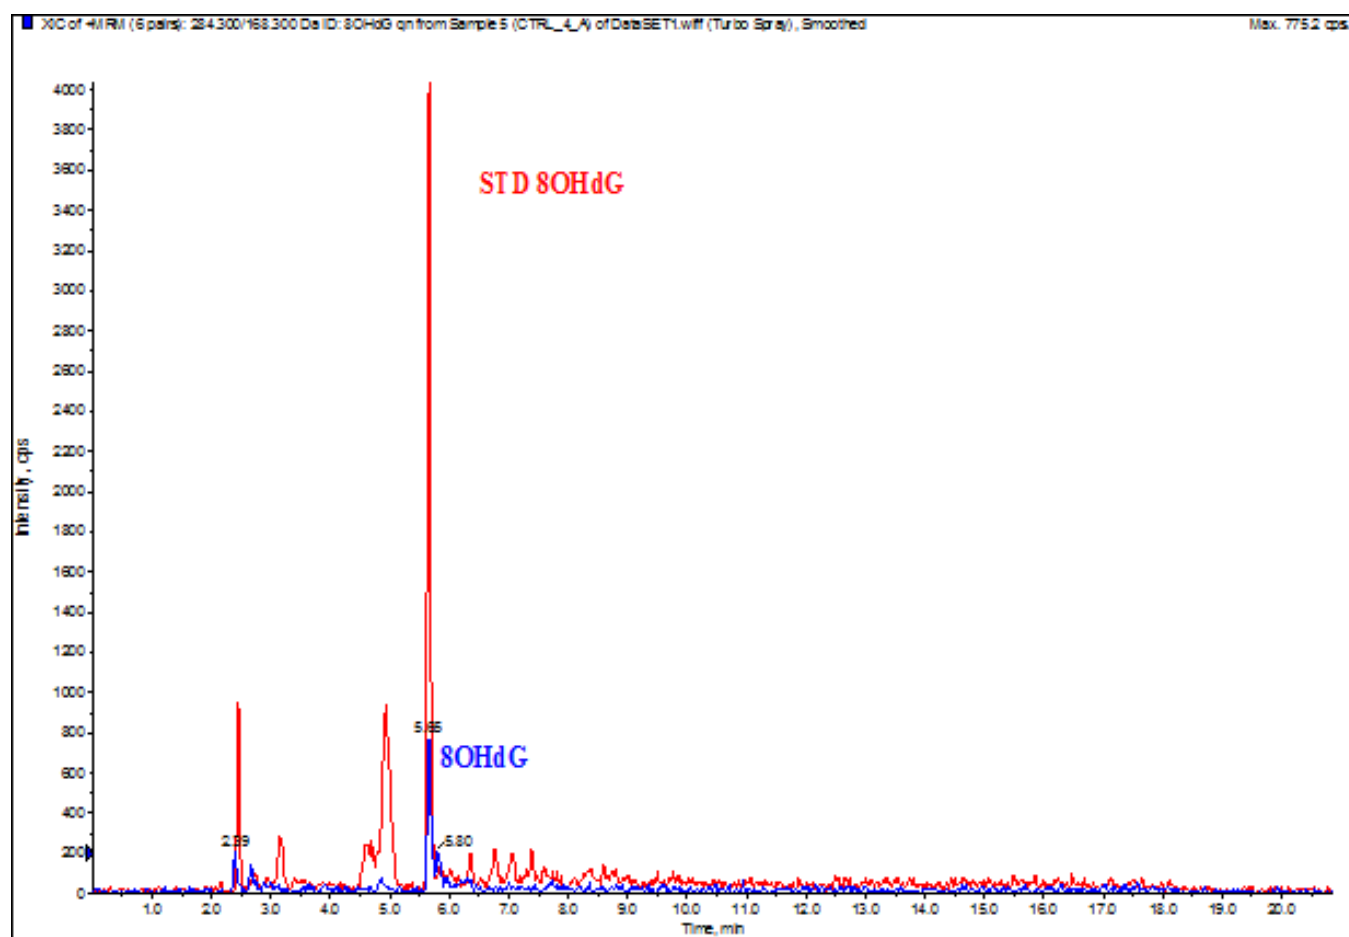

Figure S2. Chromatographic separation of 8-OHdG,  $t_R = 5.6$  min.

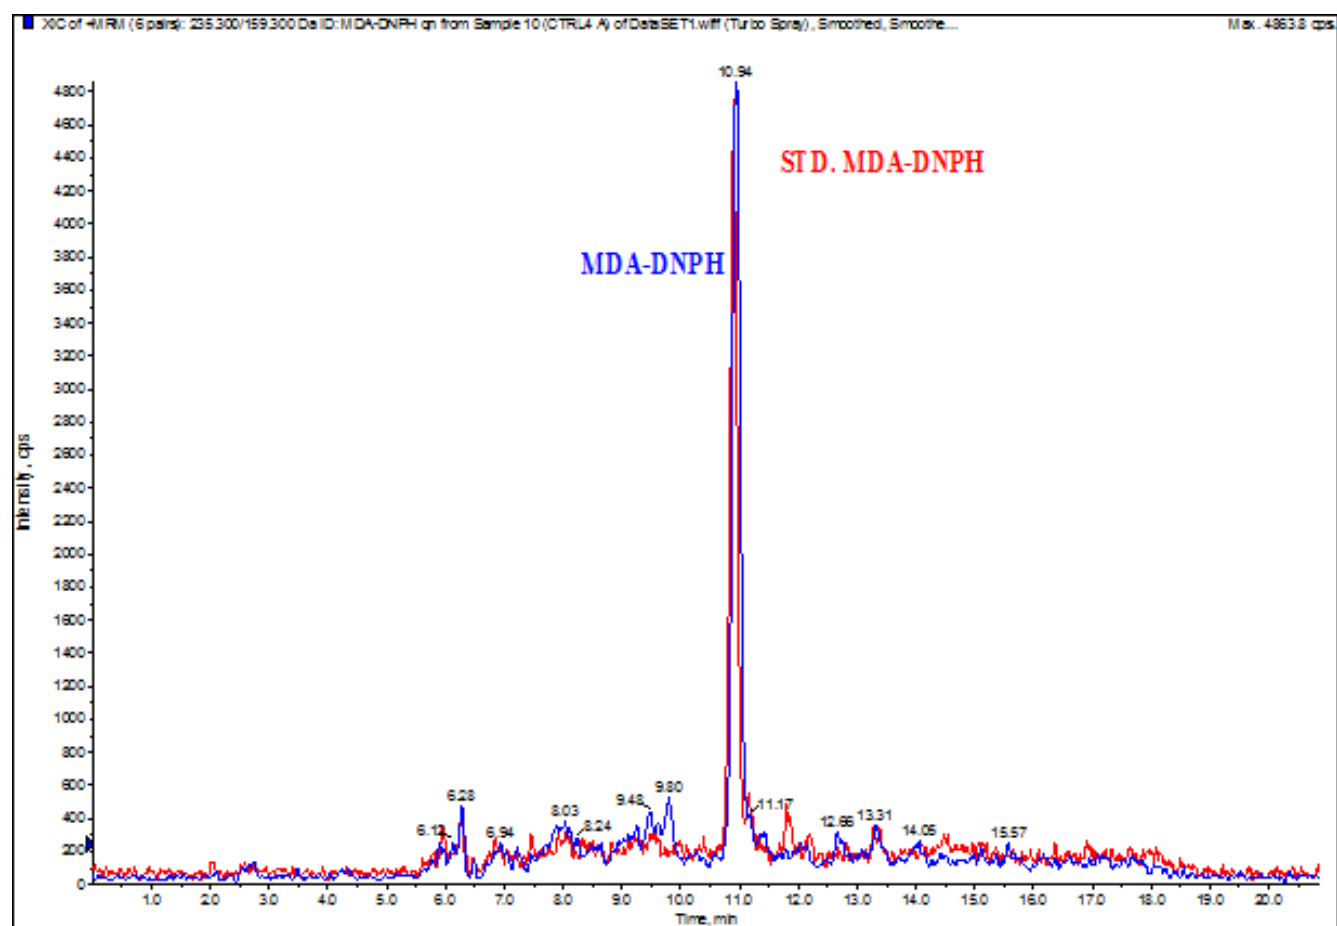

**Figure S3.** Chromatographic separation of MDA-DNPH,  $t_R = 10.9$  min.
